# Supplementary material for: (Very) Small Stem-like Cells in Human Cell Cultures
Source: Cancers (Basel). 2023 Nov 22;15(23):5520. doi: 10.3390/cancers15235520 (PMC10705060; doi:10.3390/cancers15235520)
Supplement: Supplementary file 1 [file cancers-15-05520-s001.zip]

Archive with 5 entries (5 files):
- Supplementary Figure S1.png
- Supplementary Figure S2.png
- Supplementary Figure S3.png
- Supplementary Figure S4.png
- Supplementary Materials.pdf
